# Supplementary material
Source: publisher figshare collection journal article supplement (https://tandf.figshare.com/articles/dataset/_/11390124)
Supplement: Supplementary file 1 [file 1]

## Appendix

Spoken sentences were manipulated to include tokens of the indefinite determiner *ein*[?] that were ambiguous between *ein* and *eine* (schwa manipulated between 40-52% original duration). Furthermore, we introduced rate manipulations (slow vs. fast) in the preceding context (underlined). Sentences 1-13 were used in group A of the experiment, sentences 14-25 in group B. The first target noun is feminine, the second neuter.

- (1) Schauen Sie jetzt sofort auf ein? außerordentlich zahme(s) Ziege/Pferd.  
*Now look at an exceptionally tame goat/horse.*
- (2) Schauen Sie jetzt sofort auf ein? außergewöhnlich liebe(s) Katze/Reh.  
*Now look at an exceptionally darling cat/deer.*
- (3) Schauen Sie jetzt sofort auf ein? außerordentlich nette(s) Frau/Kind.  
*Now look at an exceptionally friendly woman/child.*
- (4) Schauen Sie jetzt sofort auf ein? außergewöhnlich schlichte(s) Kirche/Dach.  
*Now look at an exceptionally plain church/roof.*
- (5) Schauen Sie jetzt sofort auf ein? außerordentlich schicke(s) Krone/Geschenk.  
*Now look at an exceptionally pretty crown/present.*
- (6) Schauen Sie jetzt sofort auf ein? außergewöhnlich dicke(s) Spinne/Walross.  
*Now look at an exceptionally fat spider/walrus.*
- (7) Schauen Sie jetzt sofort auf ein? außerordentlich schwere(s) Robbe/Nilpferd.  
*Now look at an exceptionally heavy seal/hippo.*
- (8) Schauen Sie jetzt sofort auf ein? außergewöhnlich lange(s) Angel/Flugzeug.  
*Now look at an exceptionally long fishing rod/airplane.*
- (9) Schauen Sie jetzt sofort auf ein? außerordentlich neue(s) Bluse/Fahrrad.  
*Now look at an exceptionally new blouse/bicycle.*

- (10) Schauen Sie jetzt sofort auf ein? außerordentlich süße(s) Orange/Eis.  
*Now look at an exceptionally sweet orange/ice cream cone.*
- (11) Schauen Sie jetzt sofort auf ein? außergewöhnlich teure(s) Perle/Schloss.  
*Now look at an exceptionally expensive pearl/castle.*
- (12) Schauen Sie jetzt sofort auf ein? außergewöhnlich hübsche(s) Fee/Kleid.  
*Now look at an exceptionally pretty fairy/dress.*
- (13) Schauen Sie jetzt sofort auf ein? außerordentlich weiche(s) Matratze/Sofa.  
*Now look at an exceptionally soft mattress/couch.*
- (14) Schauen Sie jetzt sofort auf ein? außerordentlich scharfe(s) Säge/Messer.  
*Now look at an exceptionally sharp saw/knife.*
- (15) Schauen Sie jetzt sofort auf ein? außergewöhnlich schlaue(s) Maus/Baby.  
*Now look at an exceptionally smart mouse/baby.*
- (16) Schauen Sie jetzt sofort auf ein? außergewöhnlich schöne(s) Stadt/Mädchen.  
*Now look at an exceptionally beautiful town/girl.*
- (17) Schauen Sie jetzt sofort auf ein? außerordentlich braune(s) Eule/Kamel.  
*Now look at an exceptionally brown owl/camel.*
- (18) Schauen Sie jetzt sofort auf ein? außergewöhnlich große(s) Burg/Schiff.  
*Now look at an exceptionally big fortress/ship.*
- (19) Schauen Sie jetzt sofort auf ein? außerordentlich gute(s) Wurst/Bier.  
*Now look at an exceptionally good sausage/beer.*
- (20) Schauen Sie jetzt sofort auf ein? außerordentlich böse(s) Wespe/Krokodil.  
*Now look at an exceptionally mean wasp/crocodile.*
- (21) Schauen Sie jetzt sofort auf ein? außergewöhnlich schnelle(s) Bahn/Auto.  
*Now look at an exceptionally fast train/car.*
- (22) Schauen Sie jetzt sofort auf ein? außerordentlich schlanke(s) Nase/Knie.

*Now look at an exceptionally skinny nose/knee.*

- (23) Schauen Sie jetzt sofort auf ein? außergewöhnlich wilde(s) Giraffe/Zebra.

*Now look at an exceptionally wild giraffe/zebra.*

- (24) Schauen Sie jetzt sofort auf ein? außergewöhnlich alte(s) Zeitung/Buch.

*Now look at an exceptionally old newspaper/book.*

- (25) Schauen Sie jetzt sofort auf ein? außerordentlich frische(s) Tomate/Brot.

*Now look at an exceptionally fresh tomato/bread.*
