# Supplementary material
Source: publisher figshare collection journal article supplement (https://tandf.figshare.com/articles/dataset/_/11390124)
Supplement: Supplementary file 2 [file 1]

$$\hat{x} = \sum_{i=1}^n w_i x_i$$

Equation 1 (from Landy, Banks, & Knill, 2011).  $\hat{x}$  is the estimate of the percept, and  $x_i$  is an individual cue with its associated weight  $w_i$ . A cue's weight is proportional to its reliability which, in turn, is the inverse of the cue's variance.
